# Supplementary material for: Cortical proteins may provide motor resilience in older adults
Source: PubMed Central journal article supplement (PMC8163829; doi:10.1038/s41598-021-90859-3), 2021-05-28
Supplement: 41598_2021_90859_MOESM1_ESM.pdf [file 41598_2021_90859_MOESM1_ESM.pdf]

## SUPPLEMENTAL MATERIAL FOR:

### Cortical proteins may provide motor resilience in older adults

Aron S. Buchman, Lei Yu, Shahram Oveisgharan, Vladislav A. Petyuk, Shinya Tasaki, Chris Gaiteri, Robert S. Wilson, Francine Grodstein, Julie A. Schneider, Hans-Ulrich Klein, Philip L. De Jager, David A. Bennett

| <b>CONTENTS</b>               |                                                                            | <b>PAGES</b> |
|-------------------------------|----------------------------------------------------------------------------|--------------|
| <b>eTable 1</b>               | Associations of Cortical Peptides Examined in this Study and Motor Decline | 2-6          |
| <b>eTable 2</b>               | Indices of Brain Pathologies and Motor Decline                             | 7            |
| <b>eTable 3</b>               | Factor Analysis and Factor Functions for Motor Resilience Peptides         | 8-9          |
| <b>Supplementary Figure 1</b> | Motor Resilience Factors and Motor Decline                                 | 10           |
| <b>References</b>             |                                                                            | 11-12        |

**eTable 1. Associations of Cortical Peptides Examined in this Study and Motor Decline**

|    | Peptide.Name | Peptide Sequence        | Estimate  | Standard Error | Raw_p    | FDR_p   |
|----|--------------|-------------------------|-----------|----------------|----------|---------|
| 1  | AK4_1        | IAQNFGLQHLSSGHFLR       | -0.01146  | 0.00416        | 0.00589  | 0.05118 |
| 2  | AK4_2        | SLLVPDHSVITR            | -0.01002  | 0.00434        | 0.02111  | 0.12893 |
| 3  | AMPD2_2      | HLEEIVHVEQGR            | -0.00905  | 0.0032         | 0.00466  | 0.04525 |
| 4  | ANKRD40_2    | GEMPVQLTSR              | 0.00108   | 0.0018         | 0.54695  | 0.76777 |
| 5  | AP2A2_1      | FFQPTEMASQDFFQR         | 0.0029    | 0.00518        | 0.57648  | 0.77091 |
| 6  | AP2A2_2      | YGGTFQNVSVQLPITLNK      | 0.00117   | 0.00541        | 0.82929  | 0.92647 |
| 7  | AP2B1_2      | LHDINAQMVEDQGFLDSLRL    | -0.00146  | 0.00392        | 0.7088   | 0.88016 |
| 8  | AP2M1_2      | TFITQQGIK               | 0.00492   | 0.00565        | 0.38452  | 0.66848 |
| 9  | APOD_1       | C[+57]PNPPVQENFDVNK     | -0.00232  | 0.00163        | 0.15468  | 0.3719  |
| 10 | APOD_2       | NPNLPPETVDSLK           | -0.00249  | 0.00159        | 0.11747  | 0.34036 |
| 11 | APOE_1       | GEVQAMLGQSTEELR         | 4.28E-04  | 0.00198        | 0.8287   | 0.92647 |
| 12 | APOE_2       | AATVGSLSLQPLQER         | 0.00602   | 0.0021         | 0.0041   | 0.04525 |
| 13 | APP_1        | EVC[+57]SEQAETGPC[+57]R | -0.00346  | 0.00167        | 0.0382   | 0.1666  |
| 14 | APP_2        | THPHFVIPYR              | -0.00414  | 0.00325        | 0.20187  | 0.45171 |
| 15 | ATP5F1_1     | QASIQHIQNAIDTEK         | 0.0034    | 0.00451        | 0.45172  | 0.72921 |
| 16 | ATP5F1_2     | HVVQSISTQQEK            | -0.00542  | 0.00336        | 0.1075   | 0.32392 |
| 17 | ATP5J2_1     | DFSPSGIFGAFQR           | 0.00271   | 0.00265        | 0.3067   | 0.57907 |
| 18 | ATP5J2_2     | LGELPSWILMR             | 5.97E-04  | 0.00386        | 0.87714  | 0.93506 |
| 19 | bA           | LVFFAEDVGSNK            | -0.00104  | 2.92E-04       | 3.70E-04 | 0.01065 |
| 20 | bA38         | GAIIGLMVGG              | 6.26E-04  | 6.98E-04       | 0.36988  | 0.65121 |
| 21 | BCL2L1_1     | ELVVDFLSYK              | -0.00305  | 0.00403        | 0.44875  | 0.72921 |
| 22 | BCL2L1_2     | EAGDEFELR               | 0.00198   | 0.00249        | 0.4275   | 0.71041 |
| 23 | BCR_2        | SVGDIEQELER             | -0.00993  | 0.00433        | 0.02189  | 0.12975 |
| 24 | BIN1_1       | SPSPPDGSPAATPEIR        | -3.10E-04 | 0.00118        | 0.79444  | 0.91691 |
| 25 | BIN1_2       | VNHEPEPAGGATPGATLPK     | -9.10E-04 | 0.00187        | 0.6245   | 0.81114 |
| 26 | BIN1_3       | LQAHLVAQTNLLR           | 0.00564   | 0.00412        | 0.17146  | 0.39949 |
| 27 | BIN1_4       | NQAEELIK                | 0.00789   | 0.00512        | 0.12356  | 0.34441 |
| 28 | BIN1_5       | AAPQWC[+57]QGK          | 2.64E-04  | 0.00328        | 0.93581  | 0.96487 |
| 29 | BIN1_6       | AEELIK                  | -6.30E-04 | 9.13E-04       | 0.49051  | 0.75412 |
| 30 | BIN1_7       | AQPSDNAPAK              | -0.00183  | 0.0013         | 0.15914  | 0.37465 |
| 31 | BIN1_9       | GPPVPPPPK               | 0.00312   | 0.00382        | 0.41391  | 0.69515 |
| 32 | C1QA_1       | SLGFC[+57]DTTNK         | -6.50E-04 | 0.00167        | 0.69696  | 0.87024 |
| 33 | C1QA_2       | DQPRPAFSAIR             | -4.20E-04 | 0.00164        | 0.79519  | 0.91691 |
| 34 | C9orf16_1    | LEFQQQLGEAPSDASP        | -0.00153  | 0.0025         | 0.54128  | 0.76607 |
| 35 | C9orf16_2    | LQELLESNR               | -0.00393  | 0.00233        | 0.0912   | 0.29028 |
| 36 | CASS4_2      | GTFPLDEDVSYK            | 0.00104   | 0.0018         | 0.56253  | 0.77026 |
| 37 | CBX1_1       | C[+57]PQVVISFYEER       | -0.00349  | 0.00344        | 0.31003  | 0.57907 |
| 38 | CBX1_2       | NSDEADLVPAK             | -0.00495  | 0.00276        | 0.07261  | 0.26372 |
| 39 | CD2AP_1      | VLFEYIPQNEDELELK        | -0.0038   | 0.00235        | 0.10623  | 0.32392 |
| 40 | CD44_1       | YGFIEGHVVIPR            | -0.0023   | 8.07E-04       | 0.00445  | 0.04525 |
| 41 | CD44_2       | ALSIGFETC[+57]R         | -0.00235  | 8.34E-04       | 0.00481  | 0.04525 |
| 42 | CD47_1       | STVPTDFSSAK             | 0.01043   | 0.00675        | 0.12195  | 0.34441 |
| 43 | CD47_2       | EGETIIELEK              | 0.00292   | 0.00506        | 0.56445  | 0.77026 |
| 44 | CELF1_1      | MFVGVQVPR               | 0.00324   | 0.00551        | 0.55644  | 0.77026 |
| 45 | CLINT1_1     | HIHITQATETTTTR          | 6.01E-04  | 0.00355        | 0.86526  | 0.93095 |

|    | Peptide.Name | Peptide Sequence       | Estimate  | Standard Error | Raw_p    | FDR_p    |
|----|--------------|------------------------|-----------|----------------|----------|----------|
| 46 | CLTA_1       | ELEEYAR                | 3.01E-04  | 0.00556        | 0.95679  | 0.97504  |
| 47 | CLU_1        | ASSIIDELFQDR           | -0.00414  | 0.00209        | 0.04782  | 0.18961  |
| 48 | CLU_2        | LFSDSPITVTPVEVSR       | -0.00559  | 0.00263        | 0.0336   | 0.16211  |
| 49 | COX7B_2      | TPDFHDK                | -0.00182  | 0.00178        | 0.30436  | 0.57907  |
| 50 | CPLX2_1      | AALEQPC[+57]EGSLTRPK   | 0.00195   | 0.00278        | 0.48259  | 0.74703  |
| 51 | CPLX2_2      | YLPGPLQDMFK            | -4.70E-04 | 0.00286        | 0.86916  | 0.93095  |
| 52 | CYC1_1       | GLLSSLDHTSIR           | 0.00581   | 0.00369        | 0.11488  | 0.33804  |
| 53 | CYC1_2       | LFDYFPKYPNSEAAR        | 0.01038   | 0.00455        | 0.02239  | 0.12975  |
| 54 | DIP2B_1      | LLSPYSPQTQETDSAVQK     | 9.95E-04  | 0.00252        | 0.69282  | 0.86988  |
| 55 | DOCK2_1      | DILLPVITK              | -0.00147  | 8.33E-04       | 0.0781   | 0.27153  |
| 56 | ELMO1_1      | VAIEWPGAYPK            | -7.50E-04 | 0.0011         | 0.49794  | 0.75526  |
| 57 | ELMO1_2      | LLDLENIQIPDAPPIPK      | 9.57E-04  | 0.00212        | 0.65184  | 0.82762  |
| 58 | EPS15_2      | SATSSSVSNVVITK         | -0.00384  | 0.00181        | 0.03371  | 0.16211  |
| 59 | EPS15L1_2    | GTPGPDSSGSLGSGEFTGVK   | 0.00626   | 0.00379        | 0.09799  | 0.30759  |
| 60 | FBXO2_1      | VLAALPAAELVQAC[+57]R   | -0.00517  | 0.00247        | 0.03623  | 0.1666   |
| 61 | FBXO2_2      | SDAGC[+57]LYELTVK      | -0.01049  | 0.00464        | 0.02381  | 0.13451  |
| 62 | FCER1G_1     | SDGVYTGSTR             | 3.15E-04  | 0.00163        | 0.847    | 0.93095  |
| 63 | FCHO2_1      | SASNYSQLGTFAPVWDVFK    | -0.00184  | 0.00214        | 0.38928  | 0.67159  |
| 64 | FERMT2_1     | LLIPVAEGMNEIWLK        | -0.00473  | 0.00327        | 0.14796  | 0.36536  |
| 65 | FERMT2_2     | INQGWLDSSR             | -0.00494  | 0.00314        | 0.11517  | 0.33804  |
| 66 | FYN_1        | AQFETLQQLVQHYSER       | -0.00691  | 0.00464        | 0.13678  | 0.36505  |
| 67 | FYN_3        | LIEDNEYTK              | -0.02719  | 0.00587        | 0        | 2.10E-04 |
| 68 | GFAP_1       | DNLAQDLATVR            | -0.00403  | 0.0012         | 7.70E-04 | 0.01441  |
| 69 | GFAP_2       | ALAAELNQLR             | -0.00395  | 0.00114        | 5.70E-04 | 0.01344  |
| 70 | GRB2_1       | FNSLNELVDYHR           | -0.0051   | 0.00411        | 0.21389  | 0.4648   |
| 71 | GRB2_2       | VLNEEC[+57]DQNWYK      | -0.01864  | 0.00557        | 8.30E-04 | 0.01441  |
| 72 | GSTP1_1      | FQDGLTLQYQNTILR        | -0.00868  | 0.00294        | 0.00314  | 0.0394   |
| 73 | HLA_B_2      | DGEDQTQDTELVETRPAGDR   | -0.00103  | 0.00158        | 0.51322  | 0.76308  |
| 74 | HLA_B_5      | WAAVVVPSGEEQR          | -0.00194  | 0.00154        | 0.20866  | 0.45785  |
| 75 | HSPA8_1      | NSLESYAFNMK            | 0.00751   | 0.00656        | 0.25228  | 0.52307  |
| 76 | HSPA8_2      | DAGTIAGLNVLK           | 0.0106    | 0.00715        | 0.13848  | 0.36505  |
| 77 | HSPB2_2      | TYVLPADVDPWR           | -0.00607  | 0.00181        | 8.00E-04 | 0.01441  |
| 78 | IGFBP5_1     | FVGGAEHTAHR            | -0.00728  | 0.00146        | 0        | 5.00E-05 |
| 79 | INPPL1_4     | LLDRTLQLSK             | -0.00443  | 0.00262        | 0.09017  | 0.29028  |
| 80 | ITPK1_1      | LLAEPAGGLVGER          | 0.00361   | 0.00309        | 0.24217  | 0.50677  |
| 81 | KIF5B_2      | VFQSSTSSEQVYNDK[+57]AK | 0.00183   | 0.00249        | 0.46342  | 0.7324   |
| 82 | LAMP2_2      | GILTVDELLAIR           | -0.00265  | 0.00171        | 0.12067  | 0.34441  |
| 83 | LDHA_1       | DQLIYNLLK              | 0.00898   | 0.00427        | 0.03549  | 0.1666   |
| 84 | LDHA_2       | GEMMDLQHGSLFLR         | 0.01251   | 0.00448        | 0.00525  | 0.04742  |
| 85 | LDHB_1       | LIAPVAEEEEATVPNNK      | -0.01125  | 0.00542        | 0.03784  | 0.1666   |
| 86 | LDHB_2       | GEMMDLQHGSLFLQTPK      | -0.00717  | 0.00439        | 0.10199  | 0.31576  |
| 87 | MEF2C_1      | NSPGLLVSPGNLNK         | 0.00222   | 0.00189        | 0.23883  | 0.50444  |
| 88 | MLF2_2       | LAIQGPEDSPSR           | -0.00137  | 0.00287        | 0.63325  | 0.81315  |
| 89 | MTOR_1       | VLGLLGALDPYK           | -0.00575  | 0.00565        | 0.30865  | 0.57907  |
| 90 | NCL_1        | FGYVDFESAEDLEK         | -0.00559  | 0.00385        | 0.14642  | 0.36536  |
| 91 | NCL_2        | GFGFVDFNSEEDAK         | -0.00304  | 0.00373        | 0.41524  | 0.69515  |
| 92 | NDUFA10_1    | ITSAYLQDIENAYK         | 0.00536   | 0.00243        | 0.02719  | 0.1463   |
| 93 | NDUFA10_2    | C[+57]EVLQYSAR         | 0.01106   | 0.0042         | 0.00848  | 0.06846  |

|     | Peptide.Name | Peptide Sequence       | Estimate  | Standard Error | Raw_p   | FDR_p   |
|-----|--------------|------------------------|-----------|----------------|---------|---------|
| 94  | NDUFA5_1     | ILDVLEEIPK             | 0.01076   | 0.00418        | 0.01003 | 0.07559 |
| 95  | NDUFA5_2     | LWEPLVEEPPADQWK        | 0.00724   | 0.00365        | 0.04728 | 0.18961 |
| 96  | NDUFA6_2     | FFHETEAPRPK            | 0.01315   | 0.00414        | 0.0015  | 0.02256 |
| 97  | NDUFA7_1     | ALVSGKPAESSAVAATEK     | 0.01276   | 0.00405        | 0.00163 | 0.02303 |
| 98  | NDUFA7_2     | NWASGHDLQGK            | 0.00785   | 0.0035         | 0.02508 | 0.13824 |
| 99  | NDUFS6_1     | VIAC[+57]DGGGGALGHPK   | 0.0054    | 0.00313        | 0.08469 | 0.28153 |
| 100 | NDUFS6_2     | TGTC[+57]GYC[+57]GLQFR | 0.00851   | 0.00356        | 0.01696 | 0.11276 |
| 101 | NDUFV1_1     | GPDWILGEIK             | 0.00925   | 0.00392        | 0.01821 | 0.11756 |
| 102 | NDUFV1_2     | LLEGCG[+57]LVGGR       | 0.00512   | 0.00351        | 0.14438 | 0.36536 |
| 103 | PADI2_1      | ILSNESLVQENLYFQR       | -0.00412  | 0.00162        | 0.0111  | 0.07841 |
| 104 | PADI2_2      | ELGLTEQDIIDLPALEK      | -0.0038   | 0.00162        | 0.01897 | 0.11907 |
| 105 | PICALM_1     | ITAAQHSVTGSAVSK        | 6.46E-04  | 0.00242        | 0.78948 | 0.91691 |
| 106 | PICALM_2     | ATTHEIMGPK             | 6.12E-04  | 0.00186        | 0.7419  | 0.90145 |
| 107 | PIK3R1_1     | FSAASSDNTENLIK         | -0.0017   | 0.00369        | 0.64465 | 0.82312 |
| 108 | PLP1_1       | TSASIGSLC[+57]ADAR     | -7.00E-05 | 6.93E-04       | 0.91857 | 0.96109 |
| 109 | PLP1_2       | LIETYFSK               | -8.00E-05 | 7.03E-04       | 0.90736 | 0.95378 |
| 110 | PLXNB1_1     | GQNLDDVVQTPR           | -0.00489  | 0.00236        | 0.03833 | 0.1666  |
| 111 | PLXNB1_2     | RPTVEQGLGQLSNLLNSK     | -0.00753  | 0.00267        | 0.0048  | 0.04525 |
| 112 | PTK2B_1      | LIGSVDDLLPSLPSSSR      | 0.0027    | 0.0043         | 0.53076 | 0.76607 |
| 113 | PTMS_1       | SVEAAAELSAK            | -0.00993  | 0.00324        | 0.00217 | 0.0288  |
| 114 | PTPN11_2     | IQNTGDYYDLYGGEK        | -4.30E-04 | 0.00455        | 0.9243  | 0.96264 |
| 115 | PTPRD_2      | HNVADSQITTIGNLVPQK     | -0.00312  | 0.00318        | 0.32714 | 0.60108 |
| 116 | PVALB_1      | FFQMVLGK               | 0.00104   | 0.0017         | 0.54235 | 0.76607 |
| 117 | PVALB_2      | SGFIEEDELGFILK         | 0.00113   | 0.00176        | 0.52081 | 0.76576 |
| 118 | RPL10A_2     | ILGPGLNK               | 0.00701   | 0.00641        | 0.27417 | 0.5633  |
| 119 | RPL17_1      | GLDVDSLVIHQVVK         | -0.00164  | 0.0023         | 0.4756  | 0.74129 |
| 120 | RPL35_1      | VLTVINQTKK             | 2.58E-04  | 0.00106        | 0.80726 | 0.92609 |
| 121 | RPL35_2      | YKPLDLRPK              | 0.0059    | 0.0027         | 0.02923 | 0.15361 |
| 122 | RPL35A_1     | DETEFYLGK              | 6.46E-04  | 0.00379        | 0.86462 | 0.93095 |
| 123 | RPL35A_2     | VMLYPSR                | 0.00223   | 0.00248        | 0.36798 | 0.65121 |
| 124 | RPS2_1       | SPYQEFTDHLVK           | 0.00615   | 0.00357        | 0.08471 | 0.28153 |
| 125 | RPS2_2       | TYSYLPDLWK             | 0.00456   | 0.00455        | 0.31618 | 0.5857  |
| 126 | RUVBL1_1     | TALALAIQELGSK          | -0.00652  | 0.00452        | 0.14873 | 0.36536 |
| 127 | RUVBL1_2     | YSVQLLTPANLLAK         | -0.01049  | 0.00491        | 0.03253 | 0.16211 |
| 128 | SASH1_1      | TC[+57]SFGGFDLTNR      | -0.00204  | 0.00189        | 0.27914 | 0.56833 |
| 129 | SASH1_2      | LLVDSQGLSGC[+57]SPR    | -0.00156  | 0.00171        | 0.36191 | 0.64914 |
| 130 | SDHA_2       | VGSVLQEGC[+57]GK       | -0.00216  | 0.00417        | 0.60543 | 0.79091 |
| 131 | SDHB_1       | YLGPAVLMQAYR           | 0.00258   | 0.00388        | 0.50637 | 0.75813 |
| 132 | SDHB_2       | DLVPDLSNFYAQYK         | 0.0025    | 0.00444        | 0.57258 | 0.77026 |
| 133 | SDHC_1       | SLC[+57]LGPALHTAK      | 6.61E-04  | 0.00213        | 0.75588 | 0.90386 |
| 134 | SDHC_2       | HLMWDLGK               | 1.16E-04  | 0.00219        | 0.95778 | 0.97504 |
| 135 | SDHD_1       | AASLHWTSER             | -0.00201  | 0.00327        | 0.53878 | 0.76607 |
| 136 | SDHD_2       | AVAMLWK                | -7.90E-04 | 0.00237        | 0.73879 | 0.90145 |
| 137 | SLC6A12_1    | QLITPDSSLPQPK          | 0.00169   | 0.00263        | 0.5218  | 0.76576 |
| 138 | SNAP25_1     | HMALDMGNEIDTQNR        | 0.00832   | 0.00327        | 0.01108 | 0.07841 |
| 139 | SNAP25_2     | AWGNQDGVVASQPAR        | 0.0075    | 0.00382        | 0.04977 | 0.19391 |
| 140 | SNAP25_3     | ADQLADESLESTR          | 0.00357   | 0.00297        | 0.22887 | 0.48797 |
| 141 | SNAP25_4     | TLVMLDEQGEQLER         | 0.00512   | 0.00295        | 0.08329 | 0.28153 |

|     | Peptide.Name | Peptide Sequence                | Estimate  | Standard Error | Raw_p    | FDR_p   |
|-----|--------------|---------------------------------|-----------|----------------|----------|---------|
| 142 | SNAP25_6     | FC[+57]GLC[+57]VC[+57]PC[+57]NK | 0.00172   | 0.00234        | 0.46322  | 0.7324  |
| 143 | SNAP25_7     | C[+57]C[+57]GLFIC[+57]PC[+57]NK | 0.00326   | 0.00231        | 0.1583   | 0.37465 |
| 144 | SNAP29_1     | DLPDGPDPADPR                    | -0.00865  | 0.00436        | 0.04734  | 0.18961 |
| 145 | SNAP29_2     | SVFGGLVNYFK                     | 0.00491   | 0.00549        | 0.37171  | 0.65121 |
| 146 | SNAP47_1     | NVFSIIEHFWR                     | -0.0019   | 0.00335        | 0.56951  | 0.77026 |
| 147 | SNCA_1       | EGVVHGVATVAEK                   | -1.00E-04 | 0.00376        | 0.97896  | 0.97896 |
| 148 | SNCA_2       | TVEGAGSIAAATGFVK                | 7.47E-04  | 0.00337        | 0.82429  | 0.92647 |
| 149 | SPP1_1       | AIPVAQDLNAPSDWDSR               | -0.00184  | 8.63E-04       | 0.03353  | 0.16211 |
| 150 | STX12_1      | LMNDFSAA LN NFQAVQR             | -2.40E-04 | 0.00539        | 0.96429  | 0.97551 |
| 151 | STX12_2      | ELGSLPLPLSTSEQR                 | 0.00255   | 0.00888        | 0.77371  | 0.91691 |
| 152 | STX16_1      | IDYNVEQSC[+57]IK                | 0.00273   | 0.00293        | 0.35024  | 0.63323 |
| 153 | STX16_2      | LTDAFLLLR                       | 0.00289   | 0.00239        | 0.22715  | 0.48797 |
| 154 | STX18_1      | TAVLDFIEDYLK                    | -6.30E-04 | 0.0023         | 0.78532  | 0.91691 |
| 155 | STX18_2      | TC[+57]SEAIQQLR                 | -7.80E-04 | 0.00368        | 0.83218  | 0.92647 |
| 156 | STX1A_1      | SIEQSIEQEEGLNR                  | 0.01346   | 0.00378        | 3.80E-04 | 0.01065 |
| 157 | STX1A_2      | QALSEIETR                       | 0.0093    | 0.00328        | 0.00464  | 0.04525 |
| 158 | STX1B_1      | QHSAILAAPNPDEK                  | 0.00334   | 0.00409        | 0.41415  | 0.69515 |
| 159 | STX1B_2      | AIEQSIEQEEGLNR                  | 0.00388   | 0.00415        | 0.34911  | 0.63323 |
| 160 | STX4_1       | NILSSADYVER                     | -1.00E-04 | 0.00268        | 0.97119  | 0.97551 |
| 161 | STX4_2       | HSEIQQLER                       | 2.02E-04  | 0.00261        | 0.93823  | 0.96487 |
| 162 | STX5_1       | HLQTHSNTIVVSLQSK                | 2.16E-04  | 0.00154        | 0.8883   | 0.93811 |
| 163 | STX7_1       | TLNQLGTPQDSELR                  | -0.00197  | 0.00849        | 0.8165   | 0.92647 |
| 164 | STX7_2       | EFGSLPTTPSEQR                   | -0.00364  | 0.00696        | 0.60044  | 0.79091 |
| 165 | STXBP1_1     | SSASFSTTAVSAR                   | 0.00476   | 0.00467        | 0.30819  | 0.57907 |
| 166 | STXBP1_2     | HIAEVSQEVTR                     | 0.0043    | 0.0042         | 0.30636  | 0.57907 |
| 167 | STXBP1_3     | WEVLIGSTHILTPQK                 | -0.00138  | 0.00408        | 0.7352   | 0.90145 |
| 168 | STXBP1_4     | WEVLIGSTHILTPTK                 | 0.00362   | 0.00286        | 0.20615  | 0.45675 |
| 169 | STXBP1_5     | TDEEISS                         | -0.00471  | 0.00173        | 0.00646  | 0.05405 |
| 170 | STXBP1_6     | VSFEDQAPTME                     | 0.00927   | 0.0027         | 5.90E-04 | 0.01344 |
| 171 | STXBP3_2     | AAIYFTDFC[+57]PDNLFNK           | -0.00133  | 0.00254        | 0.59927  | 0.79091 |
| 172 | STXBP5_2     | LLQPVIVSPSGTILR                 | -0.00505  | 0.00388        | 0.19373  | 0.44225 |
| 173 | STXBP6_2     | QFEGSTSFR                       | -0.0031   | 0.00295        | 0.29362  | 0.57907 |
| 174 | SV2A_1       | FEEEDDDDDFPAPSDGYR              | 5.53E-04  | 0.00233        | 0.81202  | 0.92647 |
| 175 | SV2A_2       | GGLSDGEGPPGGR                   | -0.0013   | 0.00221        | 0.55534  | 0.77026 |
| 176 | SV2B_1       | ATAFGILNGLC [+57] K             | 7.19E-04  | 0.00252        | 0.77497  | 0.91691 |
| 177 | SV2B_2       | VFTVSNIK                        | 3.39E-04  | 0.00241        | 0.88781  | 0.93811 |
| 178 | SYN1_1       | QGPPQKPPGPAGPTR                 | -0.00393  | 0.00256        | 0.12496  | 0.34441 |
| 179 | SYN1_2       | LGTEEFPLIDQTFYPNHK              | -0.00279  | 0.0027         | 0.30183  | 0.57907 |
| 180 | SYN2_1       | SFRPDFVLR                       | -0.00436  | 0.00244        | 0.07352  | 0.26372 |
| 181 | SYN2_2       | VLLVDEPHADWAK                   | -0.00513  | 0.0028         | 0.06693  | 0.24795 |
| 182 | SYN3_1       | SFKPDFILVR                      | 6.36E-04  | 0.00341        | 0.85187  | 0.93095 |
| 183 | SYN3_2       | SQSLTNSLSTSDTSQR                | -5.50E-04 | 0.00298        | 0.85327  | 0.93095 |
| 184 | SYT1_1       | VFVGYNSTGAELR                   | 0.00373   | 0.00247        | 0.13141  | 0.35782 |
| 185 | SYT1_2       | LTVVILEAK                       | 0.00146   | 0.00238        | 0.5399   | 0.76607 |
| 186 | SYT11_1      | NLLVDAAEAGLLSR                  | 0.00124   | 0.00397        | 0.7554   | 0.90386 |
| 187 | SYT12_1      | VSLLPDEQIVGISR                  | 0.00728   | 0.0022         | 9.60E-04 | 0.01546 |
| 188 | SYT2_1       | IFVGSNATGTELR                   | -9.00E-04 | 0.00131        | 0.49408  | 0.75447 |
| 189 | SYT2_2       | LTVC[+57]ILEAK                  | -6.10E-04 | 0.00138        | 0.65759  | 0.83026 |

|     | Peptide.Name   | Peptide Sequence         | Estimate  | Standard Error | Raw_p    | FDR_p    |
|-----|----------------|--------------------------|-----------|----------------|----------|----------|
| 190 | SYT7_1         | NLNPIFNESFAFDIPEK        | 0.00359   | 0.00335        | 0.28319  | 0.57143  |
| 191 | SYT7_2         | NSLETVGTDPDSGR           | 0.00597   | 0.00294        | 0.04238  | 0.18072  |
| 192 | TARDBP_1       | FGGNPGGFGNQGGFGNSR       | -0.00317  | 0.00477        | 0.50654  | 0.75813  |
| 193 | TARDBP_2       | TSDLIVLGLPWK             | -0.00487  | 0.00632        | 0.44158  | 0.72316  |
| 194 | tau_12E8       | IGSTENLK                 | -0.00399  | 0.00209        | 0.05569  | 0.21331  |
| 195 | tau_12E8_s262  | IGS[+80]TENLK            | -0.00226  | 5.27E-04       | 2.00E-05 | 8.00E-04 |
| 196 | tau_77G7       | HVPGGGSVQIVYKPVDSLK      | -7.90E-04 | 0.00245        | 0.74684  | 0.9026   |
| 197 | tau_77G7_s305  | HVPGGGS[+80]VQIVYKPVDSLK | -5.30E-04 | 6.85E-04       | 0.43694  | 0.72079  |
| 198 | tau_AT100      | TPSLPTPPTREPK            | 0.00369   | 0.0059         | 0.53173  | 0.76607  |
| 199 | tau_AT100_t217 | TPSLPT[+80]PPTREPK       | -0.00409  | 0.00106        | 1.20E-04 | 0.00458  |
| 200 | tau_AT8        | SGYSSPGSPGTPGSR          | 0.00447   | 0.00312        | 0.15171  | 0.36866  |
| 201 | tau_AT8_s202   | SGYSSPGS[+80]PGTPGSR     | -0.0024   | 0.00182        | 0.18609  | 0.42914  |
| 202 | tau_PHF1       | SPVVSVDTSR               | -3.20E-04 | 0.00192        | 0.86865  | 0.93095  |
| 203 | tau_PHF1_s404  | SPVVSVDTS[+80]PR         | -0.00258  | 0.00136        | 0.05828  | 0.21954  |
| 204 | TPRG1L_1       | TASLC[+57]QLESFK         | -0.00744  | 0.00286        | 0.0093   | 0.07245  |
| 205 | TRIM28_1       | LSPPYSSPQEFQDVGR         | -0.00369  | 0.00453        | 0.41523  | 0.69515  |
| 206 | TRIM28_2       | VFPGSTTEDYNLIVIER        | -6.00E-04 | 0.00313        | 0.84745  | 0.93095  |
| 207 | UGT8_2         | LIEWLPQNDLLGHSK          | -4.30E-04 | 8.90E-04       | 0.63048  | 0.81315  |
| 208 | UNC5C_1        | IAC[+57]TTLC[+57]PVDGR   | -4.90E-04 | 0.00176        | 0.78025  | 0.91691  |
| 209 | UQCR10_1       | AFDQGADAIYDHINEGK        | 7.57E-04  | 0.00146        | 0.60262  | 0.79091  |
| 210 | UQCR10_2       | LYSLLFR                  | 0.00249   | 0.00439        | 0.57014  | 0.77026  |
| 211 | UQCRC2_1       | TIAQGNLSNTDVQAAK         | 0.00772   | 0.00436        | 0.07702  | 0.27153  |
| 212 | UQCRC2_2       | YEDFSNLGTTHLLR           | 0.00447   | 0.00424        | 0.29137  | 0.57907  |
| 213 | VAMP1_1        | ADALQAGASQFESSAAK        | -0.00138  | 0.00193        | 0.47391  | 0.74129  |
| 214 | VAMP1_2        | LQQTQAQVEEVVDIIR         | 8.40E-05  | 0.0021         | 0.96805  | 0.97551  |
| 215 | VAMP5_1        | SDQLLDMSSTFNK            | -0.00375  | 0.00189        | 0.04678  | 0.18961  |
| 216 | VAPB_1         | EAKPEDLMDSK              | 0.00758   | 0.00514        | 0.14033  | 0.36505  |
| 217 | VAPB_2         | VEQVLSLEPQHELK           | 0.01584   | 0.00656        | 0.0157   | 0.1075   |
| 218 | VAT1_1         | GVDIVMDPLGGSDTAK         | -0.00339  | 0.00198        | 0.08629  | 0.28262  |
| 219 | VAT1_2         | TWWNQFSVTALQLLQANR       | -0.00237  | 0.00186        | 0.20165  | 0.45171  |
| 220 | VDAC2_1        | VNNSLIGVGYTQTLRPGVK      | -2.40E-04 | 0.0031         | 0.93926  | 0.96487  |
| 221 | VDAC2_2        | LTLALVDGK                | -0.00108  | 0.00304        | 0.72225  | 0.89196  |
| 222 | VGf_1          | LADLASDLLLQYLLQGGAR      | 0.00722   | 0.00139        | 0        | 2.00E-05 |
| 223 | VGf_2          | LQEQEELNYIEHVLLR         | 0.00801   | 0.00151        | 0        | 2.00E-05 |
| 224 | VPS35_2        | FTLPLVFAAYQLAFR          | -0.00448  | 0.00304        | 0.14053  | 0.36505  |
| 225 | VSNL1_1        | SDPSIVLLLQC[+57]DIQK     | 0.00696   | 0.00482        | 0.14859  | 0.36536  |
| 226 | VSNL1_2        | LNLEEFQQLYVK             | 0.00448   | 0.00603        | 0.45723  | 0.7324   |

In 226 separate linear mixed effects models, the association of each of the 226 peptides was examined with trajectory of motor function prior to death. Each model includes seven terms: Time (the annual rate of change in motor decline prior to death), as well as age, sex and each peptide and their interaction with Time. Each row shows the results for the interaction of Time with the peptide shown in the left column; Estimate, Standard Error and raw and FDR p-Value; (results for the other terms are not shown). In peptide sequence modifications, cysteine carbamidomethylation and phosphorylation are denoted as [+57] and [+80], respectively.

**eTable 2. Indices of Brain Pathologies and Motor Decline**

| <b>Model Term</b>           | <b>Estimate</b> | <b>Standard Error, p-Value</b> |
|-----------------------------|-----------------|--------------------------------|
| Time                        | -0.024          | 0.002, <0.001                  |
| Age at death                | -0.011          | 0.001, <0.001                  |
| Sex                         | 0.047           | 0.018, 0.010                   |
| AD pathology                | -0.028          | 0.015, 0.052                   |
| Lewy bodies                 | -0.035          | 0.021, 0.095                   |
| Nigral neuronal loss        | -0.042          | 0.012, <0.001                  |
| TDP-43                      | 0.005           | 0.008, 0.501                   |
| Hippocampal sclerosis       | 0.011           | 0.031, 0.729                   |
| Macroinfarct                | -0.074          | 0.018, <0.001                  |
| Microinfarct                | -0.027          | 0.019, 0.147                   |
| Atherosclerosis             | -0.029          | 0.011, 0.008                   |
| Arteriolosclerosis          | -0.026          | 0.010, 0.008                   |
| CAA                         | -0.012          | 0.008, 0.147                   |
| Time *Age at death          | 0.0005          | 0.0002, <0.001                 |
| Time*Sex                    | -0.004          | 0.002, 0.040                   |
| Time *AD pathology          | <b>-0.004</b>   | <b>0.002, 0.009</b>            |
| Time *Lewy bodies           | -0.004          | 0.002, 0.050                   |
| Time *Nigral neuronal loss  | <b>-0.004</b>   | <b>0.001, 0.002</b>            |
| Time *TDP-43                | -0.0000         | 0.001, 0.965                   |
| Time *Hippocampal sclerosis | 0.002           | 0.003, 0.457                   |
| Time *Macroinfarct          | <b>-0.004</b>   | <b>0.002, 0.034</b>            |
| Time *Microinfarct          | 0.0001          | 0.002, 0.938                   |
| Time *Atherosclerosis       | <b>-0.003</b>   | <b>0.001, 0.004</b>            |
| Time *Arteriolosclerosis    | -0.001          | 0.001, 0.193                   |
| Time *CAA                   | -0.001          | 0.001, 0.103                   |

This table shows the results for a single linear mixed-effects model that examines the association of each of its terms with the level of motor function proximate to death and the annual rate of change in motor decline prior to death. This model includes twenty-five terms including: Time, the annual rate of change in motor decline prior to death, as well as age, sex and 10 indices of brain pathology and their interaction with Time. Each row shows the Estimate, Standard Error and p-Value for the single term shown in the left column.

**eTable 3. Factor Analysis and Factor Functions for Motor Resilience Peptides**

| Rotated Factor Pattern of Motor Resilience Peptides |                |                     |                     |                    |          |
|-----------------------------------------------------|----------------|---------------------|---------------------|--------------------|----------|
| Peptide                                             | Factor 1       | Factor 2            | Factor 3            | Factor 4           | Factor 5 |
|                                                     | Cell Structure | Signal Transduction | Synaptic Plasticity | Cell Proliferation | APOE     |
| GFAP_2                                              | 0.922          | -0.216              | -0.203              | 0.051              | -0.013   |
| GFAP_1                                              | 0.913          | -0.223              | -0.184              | 0.058              | 0.020    |
| CD44_2                                              | 0.829          | -0.343              | -0.276              | -0.199             | -0.025   |
| CD44_1                                              | 0.822          | -0.339              | -0.283              | -0.197             | -0.007   |
| GSTP1_1                                             | 0.519          | -0.432              | -0.438              | -0.245             | -0.023   |
| NDUFA7_1                                            | -0.295         | 0.757               | 0.227               | 0.192              | -0.001   |
| NDUFA6_2                                            | -0.310         | 0.754               | 0.220               | 0.155              | -0.001   |
| STXBP1_6                                            | -0.197         | 0.739               | 0.078               | -0.028             | -0.173   |
| FYN_3                                               | 0.260          | -0.461              | -0.23               | -0.031             | -0.325   |
| GRB2_2                                              | 0.350          | -0.517              | -0.239              | -0.091             | -0.321   |
| SYT12_1                                             | -0.319         | 0.573               | 0.602               | 0.196              | 0.044    |
| VGf_2                                               | -0.162         | 0.271               | 0.846               | -0.053             | 0.112    |
| VGf_1                                               | -0.142         | 0.292               | 0.827               | -0.068             | 0.093    |
| STX1A_1                                             | -0.307         | 0.299               | 0.658               | 0.209              | -0.075   |
| tau_12E8_s262                                       | 0.145          | -0.133              | -0.397              | 0.183              | 0.342    |
| HSPB2_2                                             | 0.195          | 0.114               | -0.468              | 0.095              | 0.100    |
| PTMS_1                                              | -0.030         | 0.261               | 0.173               | 0.770              | 0.024    |
| IGFBP5_1                                            | 0.023          | -0.401              | -0.269              | 0.654              | 0.086    |
| LDHA_2                                              | 0.184          | -0.316              | 0.133               | -0.508             | 0.021    |
| APOE_2                                              | -0.011         | -0.018              | -0.024              | -0.011             | 0.856    |

The cells highlighted in yellow in each column in the Table were included in the Factor at the top of the column. Further inspection of the functions of the individual proteins clustering within each factor suggested that each factor might represent distinct biological functions as discussed below.

**Factor 1** represents proteins involved in maintenance of the brain's structural integrity. **GFAP** (Glial Fibrillary Acidic Protein) is a crucial protein of astrocytes that provides structural and functional support for neurons (1). **CD44** is a transmembrane glycoprotein that is involved in diverse cellular processes acting as a bridge between the extracellular matrix and intracellular cytoskeleton (2). **GSTP1** protein (Glutathione S-Transferase P1) is a member of glutathione transferase family that is involved in detoxification of toxic compounds, and its genetic polymorphism found associated with Parkinson disease and AD (3).



**Factor 2** represents proteins involved in mitochondrial bioenergetics and synaptic signaling. Mitochondrial complex I NADH dehydrogenase is the first enzyme complex in the electron transport chain of mitochondria that are involved in many cellular processes including synaptic signaling(6). NDU has 45 subunits, including subunit 7 (**NDUFA7**) and 6 (**NDUFA6**), and its level is reportedly lower in AD and PD patients (7). **STXBP1** (Syntaxin binding protein 1) is a protein involved in synaptic vesicle fusion machinery, and its gene mutation is associated with parkinsonism (4). **SYT12** (Synaptotagmin 12) is a member of a group of proteins that are crucial synaptic vesicle (5). **GRB2** protein (Growth factor receptor bound protein 2) is involved in regulation of signaling events (8), and its level may be higher in AD brains (9).

**Factor 3** represents proteins involved in synaptic plasticity. **STX1A** protein (Syntaxin1A) is a member of the SNARE complex that is involved in intracellular vesicular trafficking including fusion of vesicles with synaptic membrane, and **SYT12** is also one of the SNARE regulatory proteins(10). **VGF** nerve growth factor inducible, is a peptide precursor whose expression is easily inducible by nerve growth factors which is divided by proteolysis into polypeptides of different mass. It has diverse physiological roles including enhancement of synaptic plasticity, neurogenesis and energy homeostasis (11).

**Factor 4** represents proteins involved in cell proliferation. **PTMS** (parathyrosin) is a small acidic nuclear protein that is involved in cell cycle progression and cell proliferation (12), and its level is associated with microglial activation induced by amyloid-beta plaques (13). **IGFBP5** (Insulin like growth factor binding protein 5) is a regulatory protein with different biological actions including inhibition of insulin-like growth factor signaling(14), and has been reported to be associated with poor motor and cognitive function in late-life (15). **LDHA** (Lactate Dehydrogenase A) is a protein that catalyzes conversion of L-lactate and NAD into pyruvate and NADH in the final step of anaerobic glycolysis. Proliferating cells, rely on this metabolic pathway, and have high expression levels of LDHA gene (16). **LDHA** gene expression has been reported to be downregulated in AD (17).

**Factor 5** was comprised of only one protein, **APOE** (Apolipoprotein E). The APOE gene is the best know genetic risk factor for late-life onset AD. Its  $\epsilon 4$  allele is associated with increased risk of AD dementia and risk of poor motor function while its  $\epsilon 2$  allele is associated with improved function (18).

### Supplementary Figure 1. Motor Resilience Factors and Motor Decline.

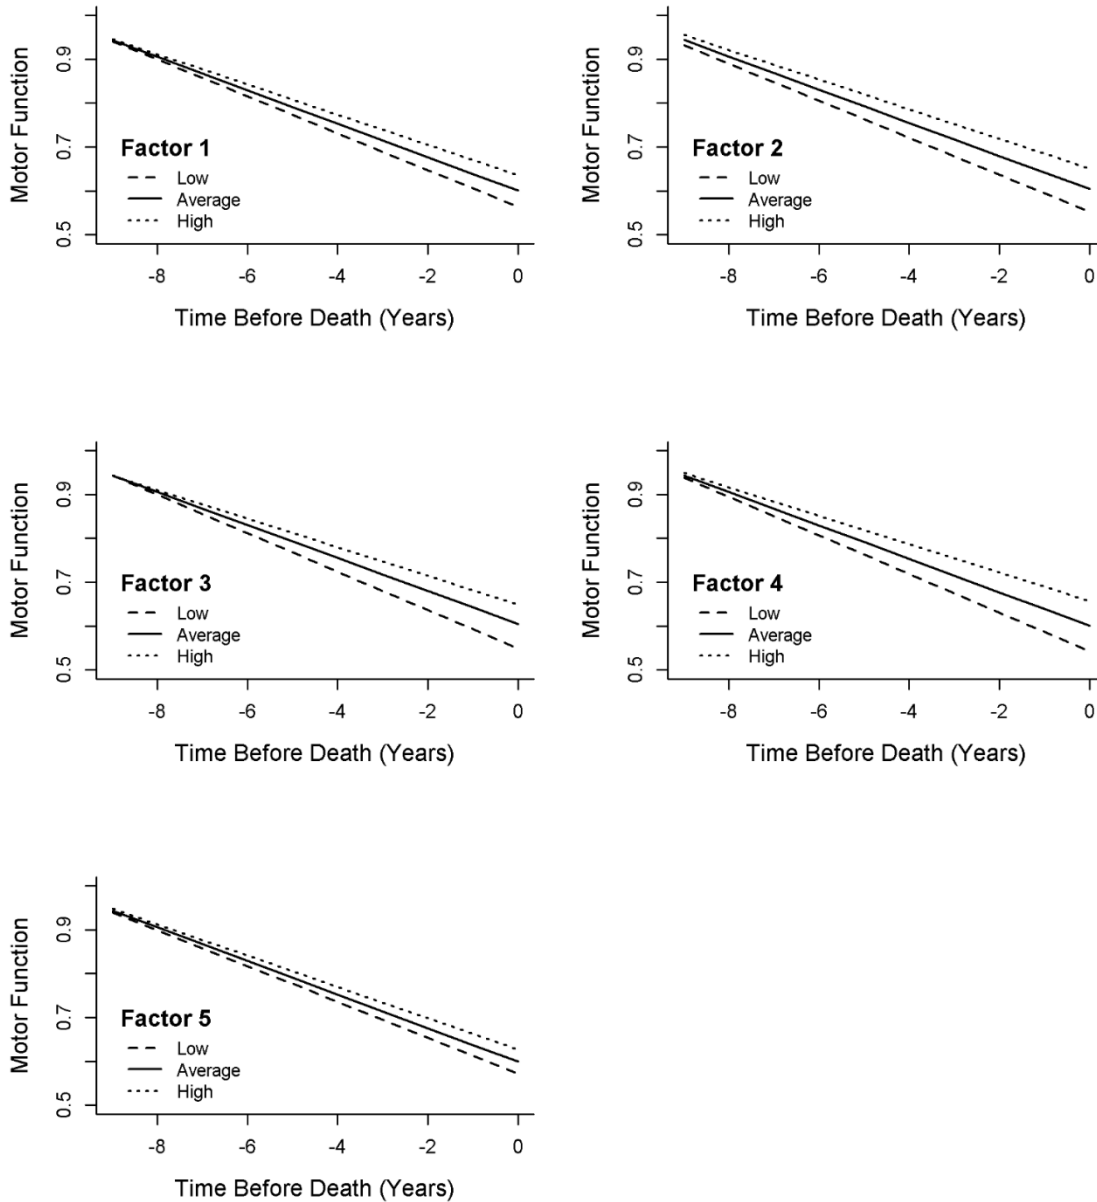

We constructed an average score for each of the 4 factors based on the constituent peptides obtained in the factor analysis (**Figure 4b; Table 2**). Factor 5 was based on the expression level of APOE. The figure illustrates the model derived trajectory of motor decline for three average older adults with high (90th percentile), average (50th percentile) and low (10th percentile) levels of each of the five factors.

## REFERENCES

1. Yang Z, Wang KKW. Glial fibrillary acidic protein: from intermediate filament assembly and gliosis to neurobiomarker. *Trends Neurosci.* 2015 Jun;38(6):364–74.
2. Ponta H, Sherman L, Herrlich PA. CD44: From adhesion molecules to signalling regulators. *Nat Rev Mol Cell Biol.* 2003 Jan;4(1):33–45.
3. Bocedi A, Noce A, Marrone G, Noce G, Cattani G, Gambardella G, et al. Glutathione Transferase P1-1 an Enzyme Useful in Biomedicine and as Biomarker in Clinical Practice and in Environmental Pollution. *Nutrients.* 2019 Jul 27;11(8):1741.
4. Lanoue V, Chai YJ, Brouillet JZ, Weckhuysen S, Palmer EE, Collins BM, et al. *STXBP1* encephalopathy: Connecting neurodevelopmental disorders with  $\alpha$ -synucleinopathies? *Neurology.* 2019 Jul 16;93(3):114–23.
5. Jahn R, Fasshauer D. Molecular machines governing exocytosis of synaptic vesicles. *Nature.* 2012 Oct;490(7419):201–7.
6. Abramov AY, Angelova PR. Cellular mechanisms of complex I-associated pathology. *Biochem Soc Trans.* 2019 Nov 26;BST20191042.
7. Holper L, Ben-Shachar D, Mann J. Multivariate meta-analyses of mitochondrial complex I and IV in major depressive disorder, bipolar disorder, schizophrenia, Alzheimer disease, and Parkinson disease. *Neuropsychopharmacology.* 2019 Apr;44(5):837–49.
8. Lee S-E, Jeong S, Lee U, Chang S. SGIP1 $\alpha$  functions as a selective endocytic adaptor for the internalization of synaptotagmin 1 at synapses. *Mol Brain.* 2019 Dec;12(1):41.
9. Majumder P, Roy K, Singh BK, Jana NR, Mukhopadhyay D. Cellular levels of Grb2 and cytoskeleton stability are correlated in a neurodegenerative scenario. *Dis Model Mech.* 2017 May 1;10(5):655–69.
10. Cupertino RB, Kappel DB, Bandeira CE, Schuch JB, da Silva BS, Müller D, et al. SNARE complex in developmental psychiatry: neurotransmitter exocytosis and beyond. *J Neural Transm.* 2016 Aug;123(8):867–83.
11. Lewis JE, Brameld JM, Jethwa PH. Neuroendocrine Role for VGF. *Front Endocrinol [Internet].* 2015 Feb 2 [cited 2020 Jun 8];6. Available from: <http://journal.frontiersin.org/Article/10.3389/fendo.2015.00003/abstract>

12. Vareli K, Frangou-Lazaridis M, van der Kraan I, Tsolas O, van Driel R. Nuclear Distribution of Prothymosin  $\alpha$  and Parathymosin: Evidence That Prothymosin  $\alpha$  Is Associated with RNA Synthesis Processing and Parathymosin with Early DNA Replication. *Exp Cell Res*. 2000 May;257(1):152–61.
13. Walker D. Gene expression profiling of amyloid beta peptide-stimulated human post-mortem brain microglia. *Neurobiol Aging*. 2001 Dec;22(6):957–66.
14. Duan C, Allard JB. Insulin-Like Growth Factor Binding Protein-5 in Physiology and Disease. *Front Endocrinol*. 2020 Mar 3;11:100.
15. Buchman AS, Yu L, Petyuk VA, Gaiteri C, Tasaki S, Blizinsky KD, et al. Cognition may link cortical IGFBP5 levels with motor function in older adults. Ginsberg SD, editor. *PLOS ONE*. 2019 Aug 12;14(8):e0220968.
16. Vander Heiden MG, Cantley LC, Thompson CB. Understanding the Warburg Effect: The Metabolic Requirements of Cell Proliferation. *Science*. 2009 May 22;324(5930):1029–33.
17. Vallée A, Lecarpentier Y, Guillevin R, Vallée J-N. Reprogramming energetic metabolism in Alzheimer's disease. *Life Sci*. 2018 Jan;193:141–52.
18. Oveisgharan S, Buchman AS, Yu L, Farfel J, Hachinski V, Gaiteri C, et al. *APOE*  $\epsilon$ 2 $\epsilon$ 4 genotype, incident AD and MCI, cognitive decline, and AD pathology in older adults. *Neurology*. 2018 Jun 12;90(24):e2127–34.
